# Supplementary material for: Preconditioning the immature lung with enhanced Nrf2 activity protects against oxidant-induced hypoalveolarization in mice
Source: PubMed Central journal article supplement (PMC7642393; doi:10.1038/s41598-020-75834-8), 2020-11-04
Supplement: 41598_2020_75834_MOESM1_ESM.pdf [file 41598_2020_75834_MOESM1_ESM.pdf]

## Supplemental Information

Preconditioning the immature lung with enhanced Nrf2 activity protects against  
oxidant-induced hypoalveolarization in mice

Chandra M Tamatam<sup>1</sup>, Narsa M Reddy<sup>1#</sup>, Haranatha R Potteti<sup>1</sup>, Aparna Ankreddy<sup>1</sup>, Patrick M  
Noone<sup>1</sup>, Masayuki Yamamoto<sup>2</sup>, Thomas W Kensler<sup>3</sup>, and Sekhar P Reddy<sup>1</sup>

**Table E1 - Primers used for qRT-PCR analysis**

| <b>Gene</b>                     | <b>Forward primer</b>            | <b>Reverse primer</b>            |
|---------------------------------|----------------------------------|----------------------------------|
| <b>Nqo1</b>                     | <b>TTCTCTGGCCGATTCAGAGT</b>      | <b>GGCTGCTTGGAGCAAAATAG</b>      |
| <b>Hmox1</b>                    | <b>CACGCATATACCCGCTACCT</b>      | <b>CCAGAGTGTTCAATTCGAGCA</b>     |
| <b>Gclm</b>                     | <b>TGGAGCAGCTGTATCAGTGG</b>      | <b>CAAAGGCAGTCAAATCTGGTG</b>     |
| <b>Gclc</b>                     | <b>CAATGGGAAGGAAGGGGTAT</b>      | <b>TCAGGATGGTTTGCAATGAA</b>      |
| <b>Gpx2</b>                     | <b>TCTTCCTCAGGGCTCAGTGT</b>      | <b>TGTGAAGGCCCCAGAACCTAC</b>     |
| <b>IL-1<math>\beta</math></b>   | <b>GCCTTGGGCCTCAAAGGAAAGAATC</b> | <b>GGAAGACACGGATTCCATGGTGAAG</b> |
| <b>TNF-<math>\alpha</math></b>  | <b>AGCCCCAGTCTGTATCCTT</b>       | <b>CTCCCTTTGCAGAACTCAGG</b>      |
| <b>IL-10</b>                    | <b>CCAGGGAGATCCTTTGATGA</b>      | <b>CATTCCCAGAGGAATTGCAT</b>      |
| <b>TGF-<math>\beta</math>1</b>  | <b>TGTGGAACTCTACCAGAAATATAGC</b> | <b>GAAAGCCCTGTATTCCGTCTC</b>     |
| <b>PUMA</b>                     | <b>GCTGAAGGACTCATGGTGAC</b>      | <b>CAAAGTGAAGGCGCACTG</b>        |
| <b>p53</b>                      | <b>CACAGCGTGGTGGTACCTTA</b>      | <b>TCTTCTGTACGGCGGTCTCT</b>      |
| <b>CHOP</b>                     | <b>CCTAGCTTGGCTGACAGAGG</b>      | <b>CTGCTCCTTCTCCTTCATGC</b>      |
| <b>Ccng1</b>                    | <b>CTTAGTAGGCCTGTCCGATCG</b>     | <b>GCAGTTTCTGAGAGTCAGTTG</b>     |
| <b>p21</b>                      | <b>GCAGTTAGGACTCAACCGTA</b>      | <b>ACCACCACACACACCATAGAAT</b>    |
| <b><math>\beta</math>-actin</b> | <b>GCAAGCAGGAGTACGATGAGT</b>     | <b>AACGCAGCTCAGTAACAGTC</b>      |

Figure E1

Whole Western Blots for Figure 1B

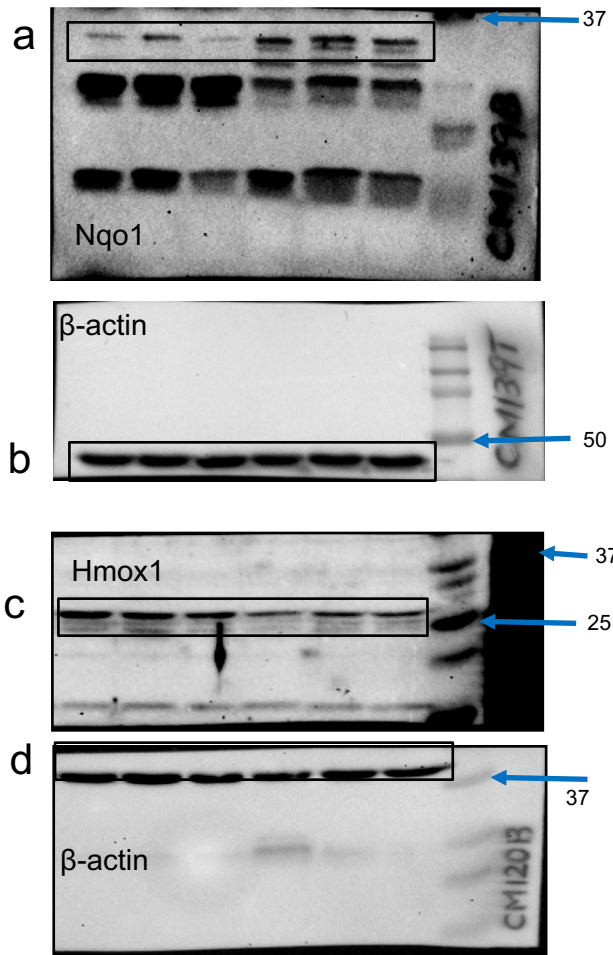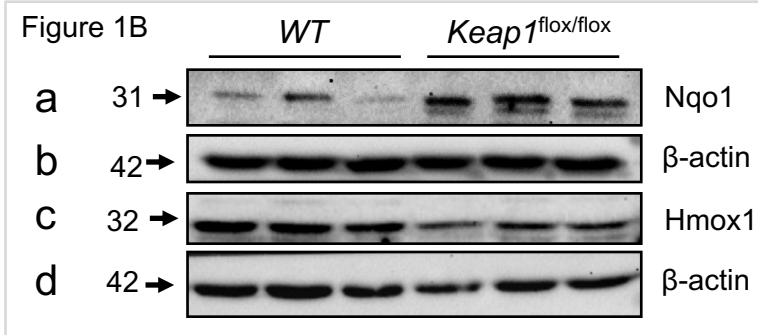

The blots of membranes (CM139 and CM120) were cut at ~40 kDa in order to probe the top (T) and bottom (B) membrane with different antibodies based on their expected sizes.

12-07-2017

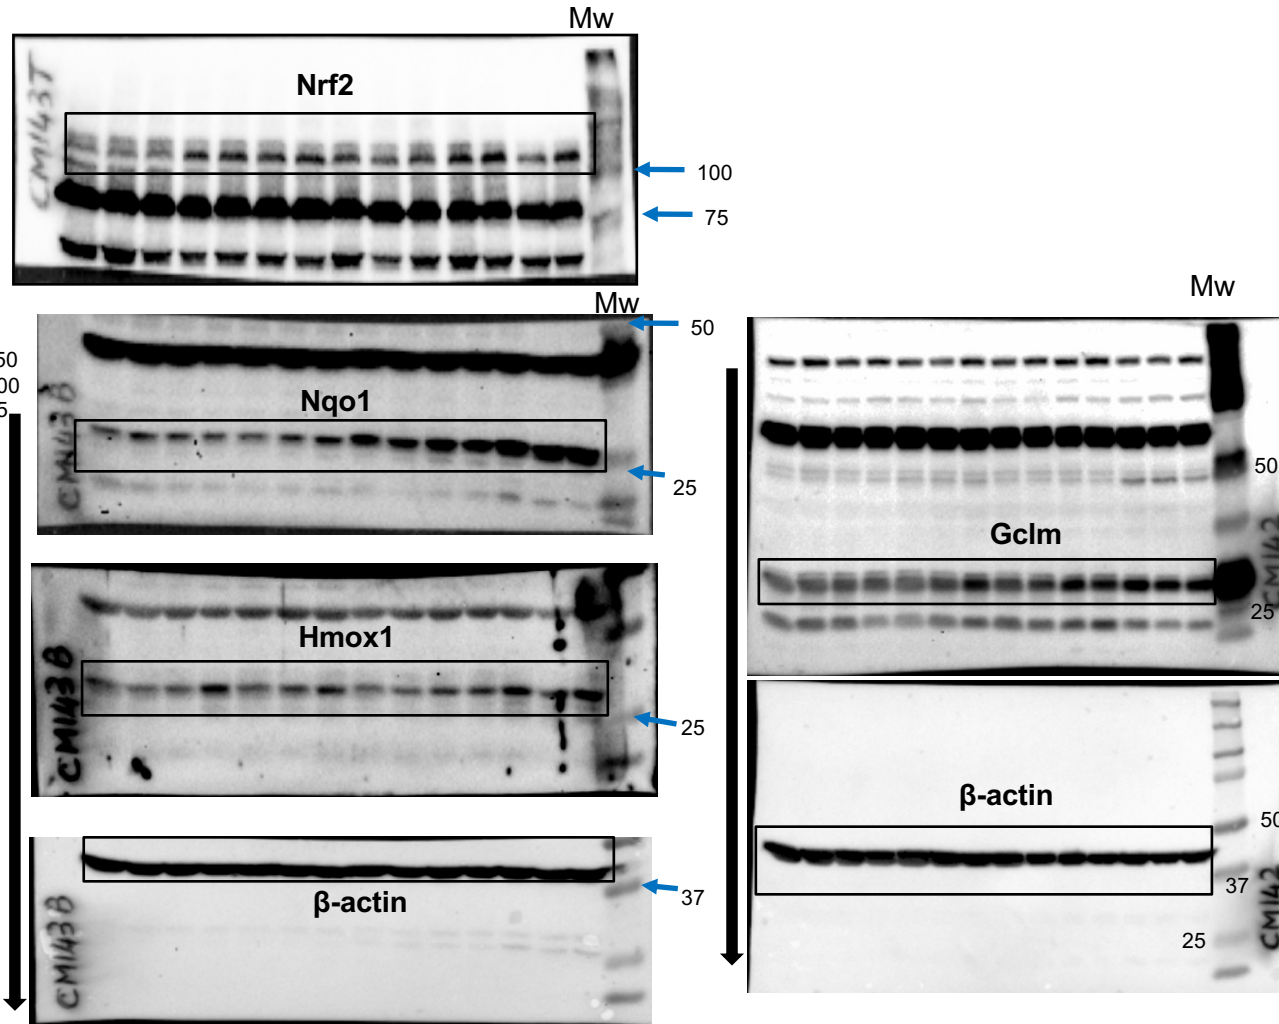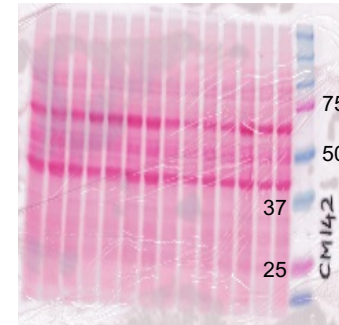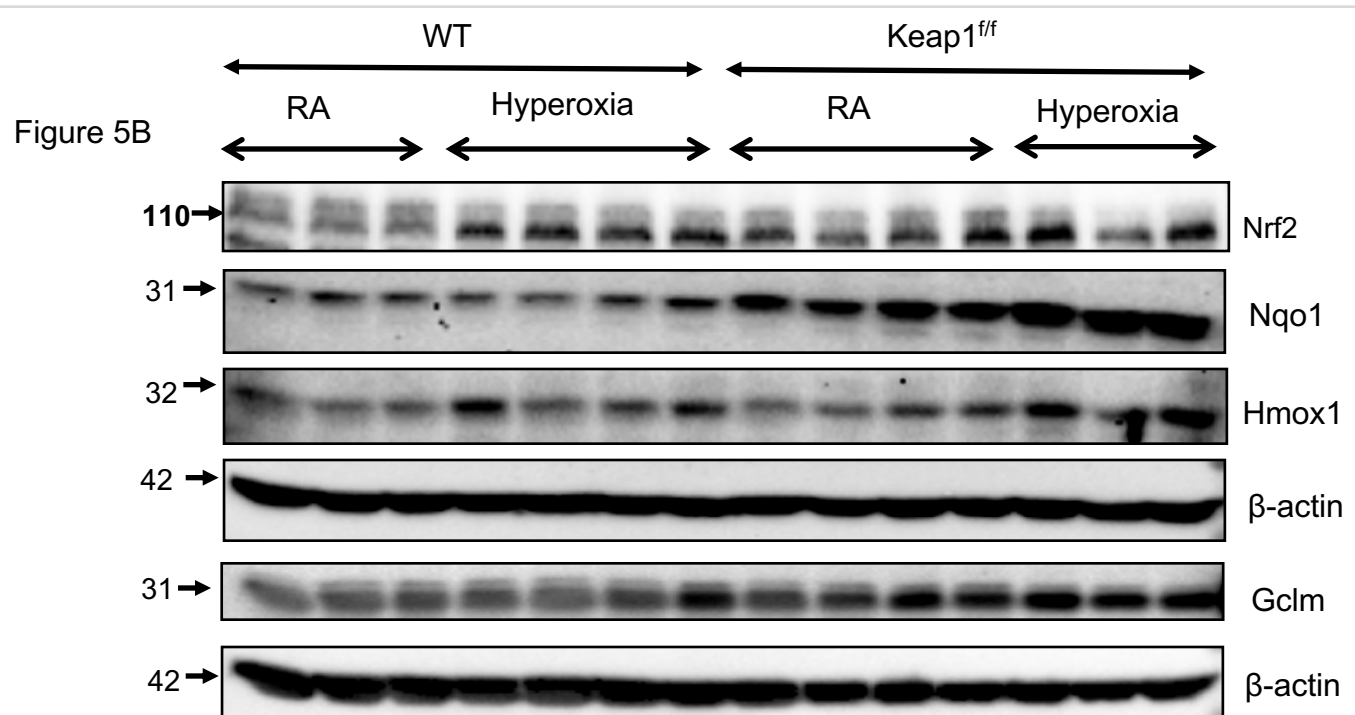

The CM143 membrane was cut at ~50 kDa in order to probe top (T) and bottom (B) membrane with different antibodies based on their molecular weight (Mw).

Filled arrows indicate the order of probing.

Mw: lane with pre-stained molecular weight markers
